# Supplementary material
Source: PubMed Central journal article supplement (PMC4849818)
Supplement: ASN.2015020185_ASN2015020185SupplementaryData.pdf [file ASN.2015020185_ASN2015020185SupplementaryData.pdf]

SUPPLEMENTAL TABLE 2: PATHOLOGIC FINDINGS

|                             | Diagnosis  | IF    | P-IF    | K/L | EM                | ATI | Fibrosis score | % Fibrosis | % inflamn | Casts | Other inclusions |
|-----------------------------|------------|-------|---------|-----|-------------------|-----|----------------|------------|-----------|-------|------------------|
| <b>Crystalline LCPT</b>     |            |       |         |     |                   |     |                |            |           |       |                  |
| 1                           | SMM        | 1+    | 3+      | κ   | Rods, rhomboid    | D   | 2              | 40         | 25        |       |                  |
| 2                           | SMM        | Neg   | 3+      | κ   | Needle            | P   | 1              | 10         | 10        |       |                  |
| 3                           | MM         | neg   | 2+      | κ   | Rods, fibrils     | D   | 0              | 0          | 0         |       |                  |
| 4                           | MM         | Neg   | 2+      | κ   | Rods              | D   | 0              | <5         | 0         |       |                  |
| 5                           | MGRS       | neg   | 2+      | κ   | Needles; striated | D   | 1              | 20         | 20        |       |                  |
| 6                           | MM         | 1+    | 3+      | κ   | Rods, fibrils     | D   | 0              | 0          | 0         |       |                  |
| 7 <sup>A</sup>              | MGRS       | neg   | 2+      | κ   | ND                | D   | 1              | 10         | 15        |       |                  |
| 8                           | MGRS       | 1+    | 2+      | κ   | Rhomboid          | D   | 1              | 15         | 15        |       |                  |
| 9                           | SMM        | 3+    | nd      | κ   | Needle            | P   | 0              | 5          | 5         |       |                  |
| 10                          | SMM        | neg   | 3+      | κ   | Rhomboid          | D   | 0              | <5         | 0         |       |                  |
| 11                          | SMM        | neg   | 1-2+    | κ   | Rods, needles     | D   | 1              | 15         | 0         |       |                  |
| 12 <sup>A</sup>             | MM         | neg   | nd      | κ   | Rhomboid          | D   | 0              | 0          | 0         |       |                  |
| 13                          | MGRS       | neg   | 2+      | κ   | Rhomboid          | D   | 0              | 0          | 0         |       |                  |
| 14                          | MGRS       | trace | 1+      | κ   | Needle, rhomboid  | D   | 2              | 30         | 25        |       | VEC, PEC, CSH    |
| 15                          | NHL        | neg   | 1+      | κ   | Rods, fibrils     | P   | 2              | 5          | 5         |       |                  |
| 16                          | MGRS       | neg   | 3+      | κ   | Rhomboid; lattice | D   | 2              | 30         | 15        |       | CSH              |
| 17                          | MGRS       | neg   | 1+ (IP) | κ   | Rods, fibrils     | D   | 2              | 50         | 25        |       |                  |
| 18                          | MM         | neg   | 3+      | κ   | ND                | D   | 1              | 10         | 0         |       |                  |
| 19                          | CLL        | 1+    | 3+      | κ   | Rhomboid, fibrils | D   | 1              | 15         | 0         |       |                  |
| 20                          | MGRS after | nd    | 3+      | κ   | Rods              | D   | 0              | 0          | 0         |       |                  |
| 21                          | MGRS       | neg   | 3+      | κ   | Rhomboid          | D   | 2              | 40         | 40        |       | CSH              |
| 22                          | MGRS       | 1+    | 2+      | κ   | Rhomboid          | D   | 3              | 80         | 10        |       |                  |
| 23                          | MGRS       | neg   | 3+      | κ   | Rhomboid          | D   | 3              | 60         | 25        |       |                  |
| 24                          | MGRS       | neg   | 2+      | κ   | Rhomboid          | D   | 2              | 50         | 25        |       |                  |
| 25                          | SMM        | neg   | neg     | κ*  | Rhomboid          | D   | 1              | 15         | 10        |       |                  |
| 26 <sup>A</sup>             | MM         | neg   | 3+      | κ   | Rhomboid          | D   | 1              | 10         | 5         |       | VEC, CSH         |
| 27                          | MGRS       | neg   | 2+      | κ   | Rhomboid          | P   | 1              | 10         | 10        |       |                  |
| 28                          | MM         | 3+    | nd      | κ   | Rhomboid          | D   | 2              | 30         | 5         | Focal |                  |
| 29 <sup>A</sup>             | MGRS       | neg   | 2+      | κ   | Rhomboid; fibrils | D   | 2              | 40         | 35        |       |                  |
| 30                          | MGRS       | Neg   | 3+      | κ   | Rhomboid          | D   | 2              | 40         | 20        |       |                  |
| 31                          | MGRS       | 1+    | 3+      | κ   | Rhomboid          | D   | 2              | 30         | 10        |       | VEC              |
| 32                          | MGRS       | neg   | 3+      | κ   | Rhomboid          | D   | 0              | 0          | 0         |       |                  |
| 33 <sup>A</sup>             | MGRS       | neg   | 1-2+    | κ   | Rhomboid          | D   | 2              | 30         | 10        |       |                  |
| 34                          | MGRS       | neg   | 3+      | κ   | Rhomboid          | D   | 3              | 65         | 50        | Focal |                  |
| 35 <sup>A</sup>             | MM         | 3+    | nd      | κ   | Ovoid, rhomboid   | P   | 2              | 30         | 30        | Focal |                  |
| 36                          | MM         | nd    | 3+      | κ   | Rhomboid          | D   | 1              | 20         | 20        | Focal |                  |
| 37                          | MGRS       | neg   | 2+      | κ   | Rhomboid          | D   | 1              | 10         | 5         | Focal |                  |
| 38 <sup>A</sup>             | MGRS       | neg   | 3+      | κ   | Rhomboid          | D   | 1              | 15         | 30        | Focal |                  |
| 39                          | MM         | neg   | 1+ (IP) | κ   | Rhomboid          | D   | 1              | 10         | 10        | Focal |                  |
| 40                          | NHL        | 3+    | nd      | κ   | Rhomboid          | D   | 1              | 15         | 5         | Focal |                  |
| <b>Non-crystalline LCPT</b> |            |       |         |     |                   |     |                |            |           |       |                  |
| 41                          | MM         | nd    | 2+      | κ   | Droplets          | A   | 1              | 15         | 15        |       |                  |
| 42                          | MM         | 1+    | 3+      | κ   | Vacuolar          | D   | 0              | 10         | 0         | Focal |                  |
| 43                          | MM         | 1+    | nd      | λ   | Vacuolar          | D   | 2              | 30         | 5         |       |                  |
| 44                          | SMM        | 2-3+  | nd      | κ   | Droplets          | A   | 2              | 40         | 5         |       |                  |
| 45 <sup>A</sup>             | MM         | 1+    | nd      | λ   | Droplets          | A   | 1              | 15         | 5         |       |                  |
| 46                          | MM         | 2+    | 2+      | κ   | Droplets          | A   | 0              | 0          | 0         |       |                  |

ATI, acute tubular injury; A, absent; D, diffuse; P, patchy. Fibrosis score: 0 = absent, 1 =mild, 2 =moderate, 3 =severe  
 IF, immunofluorescence on frozen; IF-P, immunofluorescence after pronase digestion; IP, immunoperoxidase; K/L, kappa or lambda light chain  
 EM, electron microscopy inclusions  
 VEC, visceral epithelial cell; PEC, parietal epithelial cell; CSH, crystal storing histiocytes  
 ND, not done  
<sup>A</sup> second opinion case; \*, monoclonal kappa light chain in urine

SUPPLEMENTAL TABLE 1: CLINICAL FEATURES

|                 | Diagnosis                   | Age (years) | HTN | DM | sCr<br>mg/dL | eGFR | Proteinuria<br>g/day | Serum LC      | Urine LC   | Serum<br>FLC | Fanconi syndrome |
|-----------------|-----------------------------|-------------|-----|----|--------------|------|----------------------|---------------|------------|--------------|------------------|
| <b>Case #</b>   | <b>Crystalline LCPT</b>     |             |     |    |              |      |                      |               |            |              |                  |
| 1               | SMM                         | 47          | y   | n  | 2            | 39   | 3.3                  | Neg           | κ          | 216          | G, P, U, A, AA   |
| 2               | SMM                         | 57          | y   | n  | 2.5          | 21   | 2.5                  | κ             | κ          |              | G, U, A          |
| 3               | MM                          | 47          | n   | n  | 1.1          | 60   | 1.92                 | IgG κ         | unknown    |              | No               |
| 4               | MM                          | 59          | n   | n  | 1.6          | 46   | 1.412                | IgG κ + IgG λ | κ and λ    |              | No               |
| 5               | MGRS                        | 76          | y   | n  | 3.3          | 17   | 2                    | IgG κ         | IgG κ      |              | G                |
| 6               | MM                          | 39          | n   | n  | 2.3          | 34   | 1                    | IgG κ         | unknown    | 1700         | G                |
| 7 <sup>^</sup>  | MGRS                        | 43          | n   | n  | 1.8          | 45   | 7                    | IgG κ         | unknown    |              | G, AA, A         |
| 8               | MGRS                        | 68          | Y   | Y  | 1.9          | 35   | 6.7                  | IgA κ + IgG κ | unknown    |              | No               |
| 9               | SMM                         | 51          | Y   | n  | 1            | 65   | 1.49                 | Neg           | κ          |              | G, Bone, A, P    |
| 10              | SMM                         | 59          | y   | n  | 1.6          | 46   | 0.7                  | IgG κ         | κ          |              | No               |
| 11              | SMM                         | 60          | y   | n  | 1.8          | 40   | 1.86                 | Neg           | κ          |              | No               |
| 12 <sup>^</sup> | MM                          | 42          | n   | n  | 0.7          | 92   | 2                    | κ             | unknown    |              | No               |
| 13              | MGRS                        | 58          | n   | n  | 1.5          | 51   | 3.5                  | κ + λ         | κ + λ      |              | No               |
| 14              | MGRS                        | 49          | n   | n  | 1.4          | 59   | 7.25                 | IgG κ         | IgG κ + κ  |              | No               |
| 15              | NHL                         | 55          | n   | n  | 3.7          | 13   | 1.5                  | Neg           | κ          | 0.9          | G                |
| 16              | MGRS                        | 81          | Y   | n  | 4.4          | 12   | 0.75                 | IgG κ         | IgG κ      |              | No               |
| 17              | MGRS                        | 75          | Y   | n  | 2.5          | 24   | 2.9                  | IgA κ; IgG κ  | unknown    | 47.6         | No               |
| 18              | MM                          | 75          | n   | n  | 2.5          | 24   | 3                    | κ (1.6g)      | κ (0.624g) |              | No               |
| 19              | CLL                         | 60          | Y   | n  | 2            | 35   | 2.8                  | Neg           | κ          |              | G, P, U          |
| 20              | MGRS after 36               | 72          | n   | n  | 1.5          | 35   | 4                    | Neg           | Neg        |              | No               |
| 21              | MGRS                        | 85          | n   | n  | 6            | 6    | 4                    | Neg           | κ          |              | No               |
| 22              | MGRS                        | 52          | n   | n  | 4.4          | 14   | 1                    | Neg           | κ          |              | G                |
| 23              | MGRS                        | 47          | n   | n  | 2.2          | 34   | 2.6                  | IgG κ         | IgG κ      | 8.2          | G, A, Bone       |
| 24              | MGRS                        | 65          | n   | n  | 2.7          | 24   | 2                    | κ             | κ          |              | No               |
| 25              | SMM                         | 61          | Y   | n  | 1.73         | 48   | 2.8                  | Neg           | κ          |              | G, P, U          |
| 26 <sup>^</sup> | MM                          | 42          | n   | n  | 1.1          | 62   | 1                    | IgG κ (1.6g)  | IgG κ + κ  | 350          | No               |
| 27              | MGRS                        | 51          | Y   | n  | 1.5          | 53   | 2.3                  | Neg           | κ          |              | No               |
| 28              | MM                          | 56          | Y   | Y  | 2.86         | 24   | 0.123                | IgG κ + κ     | κ          |              | No               |
| 29 <sup>^</sup> | MGRS                        | 44          | n   | n  | 3.3          | 22   | 2.39                 | IgG κ         | κ          |              | G, A             |
| 30              | MGRS                        | 81          | n   | n  | 2.7          | 16   | 5.5                  | IgG κ         | unknown    |              | No               |
| 31              | MGRS                        | 81          | Y   | n  | 2.5          | 18   | 2.9                  | κ             | κ          | 18.5         | G                |
| 32              | MGRS                        | 53          | n   | n  | 2            | 37   | 0.9                  | κ             | unknown    |              | G                |
| 33 <sup>^</sup> | MGRS                        | 71          | n   | n  | 1.5          | 46   | 3.3                  | Neg           | κ (0.825g) | 33.7         | G, P, A          |
| 34              | MGRS                        | 74          | Y   | n  | 2.9          | 15   | 1.76                 | IgG κ         | unknown    |              | No               |
| 35 <sup>^</sup> | MM                          | 82          | Y   | n  | 4.9          | 8    | 3.5                  | unknown       | unknown    |              | Bone             |
| 36              | MM                          | 77          | Y   | n  | 2.1          | 29   | 3.5                  | IgG κ         | κ          |              | U                |
| 37              | MGRS                        | 58          | Y   | n  | 1.3          | 60   | 1.28                 | κ             | κ          |              | No               |
| 38 <sup>^</sup> | MGRS                        | 87          | n   | n  | 4            | 13   | 0                    | Neg           | κ          |              | No               |
| 39              | MM                          | 45          | n   | n  | 3.3          | 21   | 16                   | κ             | κ          | 25           | No               |
| 40              | NHL                         | 70          | n   | n  | 1.1          | 51   | 2.53                 | IgA κ + κ     | IgA κ + κ  |              | No               |
|                 | <b>Non-crystalline LCPT</b> |             |     |    |              |      |                      |               |            |              |                  |
| 41              | MM                          | 87          | Y   | n  | 0.6          | 95   | 7                    | IgA κ         | κ          |              | No               |
| 42              | MM                          | 61          | Y   | n  | 1.29         | 45   | 4.3                  | IgG κ         | unknown    |              | No               |
| 43              | MM                          | 67          | Y   | n  | 9            | 5    | 10                   | IgG λ         | Neg        |              | No               |
| 44              | SMM                         | 87          | Y   | n  | 2.3          | 25   | 0.15                 | IgG κ         | unknown    | 24           | unknown          |
| 45 <sup>^</sup> | MM                          | 70          | Y   | n  | 0.7          | 88   | 7.4 (1+)             | IgG λ + λ     | unknown    | <0.01        | No               |
| 46              | MM                          | 75          | n   | n  | 0.6          | 97   | 4.1                  | κ             | κ          |              | No               |

HTN, hypertension; DM; diabetes mellitus

K, kappa; L, lambda; LC, light chains; FLC, serum free light chain ratio (kappa/lambda); LCPT, light chain proximal tubulopathy

CLL, chronic lymphocytic leukemia; MGRS, monoclonal gammopathy of renal significance;

MM, multiple myeloma; NHL, non-Hodgkin lymphoma; SMM, smoldering myeloma

eGFR, estimated glomerular filtration rate in cc/min/1.73 m<sup>2</sup>

Fanconi, Fanconi syndrome; Bone, bone pain; G, glycosuria; AA, aminoaciduria; A, metabolic acidosis; P, hypophosphatemia; U, hypouricacidemia

Proteinuria, (dipstick)

<sup>^</sup> second opinion case

SUPPLEMENTAL TABLE 3: FOLLOW-UP

| Case #                      | Diagnosis | Treatment |                                         | Outcomes           |         |       |           |          |             |               |          |                     |                   |                      |    |
|-----------------------------|-----------|-----------|-----------------------------------------|--------------------|---------|-------|-----------|----------|-------------|---------------|----------|---------------------|-------------------|----------------------|----|
|                             |           | SCT       | Chemo                                   | Follow-up (months) | Last Cr | Δ SCR | Last eGFR | Last Uvp | Last serum  | Last Urine M  | Last FLC | Hematologic outcome | Renal outcome     | Died (mos)           |    |
| <b>Crystalline LCPT</b>     |           |           |                                         |                    |         |       |           |          |             |               |          |                     |                   |                      |    |
| 1                           | SMM       | no        | D;T;B,D                                 | 133                | 2.14    | 0.14  | 33        | 1.68     | Neg         | κ             |          | 95.7                | SD                | CKD, FS              |    |
| 2                           | SMM       | no        | None                                    | 22                 | 1.7     | -0.8  | 38        | 1+       | κ           | κ             |          |                     | SD                | CKD                  | 48 |
| 3                           | MM        | no        | None                                    | 141                | 1.47    | 0.37  | 38        | 1.4      | Neg         | κ             |          | 16.8                | SD (MM at 71 mos) | CKD                  |    |
| 4                           | MM        | Yes       | L,D;CDEP                                | 132                | 1.58    | -0.02 | 45        | 1.4      | IgG λ       | unk           |          | 5.6                 | SD (MM at 54 mos) | CKD                  |    |
| 6                           | MM        | Yes       | B,T,D;P,D<br>R;P,C,ET;<br>B;L,D;<br>Pom | 107                | 1.55    | -0.75 | 50        | 0.84     | IgG κ       | κ             |          | 316                 | SD                | CKD                  |    |
| 8                           | MGRS      | no        | None                                    | 70                 | 10      | 9.1   | HD        |          | IgA κ       | κ             |          |                     | SD                | ESRD                 |    |
| 9                           | SMM       | Yes       | D;CDEP;L<br>+D                          | 109                | 1.35    | 0.35  | 41        | 1.7      | Neg         | Neg           |          | 0.69                | CR                | CKD, proteinuria, FS |    |
| 10                          | SMM       | no        | None                                    | 98                 | 1.44    | -0.16 | 50        | 1.87     | unk         | κ 1.17 g/day  |          | 125                 | SD                | CKD, proteinuria     |    |
| 11                          | SMM       | no        | None                                    | 95                 | 2.22    | 0.42  | 30        | 1.96     | unk         | κ 0.9 g/day   |          | 118                 | SD                | CKD                  |    |
| 12^                         | MM        | Yes       | B,T,L                                   | 96                 | 0.5     | -0.2  | 135       | neg      | κ           | unk           |          |                     | PR                | NI                   |    |
| 15                          | NHL       | no        | CHOP,<br>RTX                            | 76                 | 1       | -2.7  | 58        | neg      | Neg         | Neg           |          |                     | CR                | CKD                  |    |
| 16                          | MGRS      | no        | None                                    | 18                 | HD      | NA    | HD        |          | IgG κ       | IgG κ         |          |                     | SD                | ESRD                 | 18 |
| 18                          | MM        | no        | L,P                                     | 28                 | 2.2     | -0.3  | 28        | 0.624    | Neg         | κ             |          |                     | SD                | CKD                  | 30 |
| 19                          | CLL       | no        | D,C,F                                   | 7                  | 1.27    | -0.63 | 61        | 0.7      |             |               |          |                     | SD                | CKD                  | 31 |
| 20                          | MGRS afte | no        | B,D                                     | 39                 | 1.6     | 0.1   | 32        |          | Neg         | Neg           |          | 23                  | CR                | CKD                  |    |
| 21                          | MGRS      | no        | D                                       | 19                 | 2       | -4    | 24        | 1.5      | Neg         | κ             |          |                     | SD                | CKD, proteinuria     | 19 |
| 22                          | MGRS      | Yes       | M                                       | 57                 | 2.84    | -1.56 | 24        | 0.3      | Neg         | κ 0.91 g/day  |          |                     | SD                | CKD                  |    |
| 23                          | MGRS      | no        | B,D                                     | 39                 | 3.1     | 0.9   | 22        | 2.6      | 1.1 g       | unk           |          | 15.8                | SD                | CKD, proteinuria, FS |    |
| 24                          | MGRS      | no        | B                                       | 36                 | 5       | 2.3   | 11        |          |             |               |          |                     | SD                | CKD                  |    |
| 25                          | SMM       | no        | none                                    | 27                 | 1.8     | 0.07  | 47        | 2.6      | Neg         | κ             |          | 20                  | SD                | CKD, FS              |    |
| 26^                         | MM        | Yes       | B,D; L                                  | 15                 | 0.9     | -0.2  | 69        | 0.72     | IgG κ       | κ 0.72 g/day  |          | 21                  | SD                | NI                   |    |
| 27                          | MGRS      | Yes       | L,B,D;M                                 | 14                 | 1.55    | 0.05  | 48        | 0.8      | Neg         | κ 0.049 g/day |          | 1.16                | VGPR              | CKD                  |    |
| 28                          | MM        | Yes       | V,C,D;M;L                               | 15                 | 1.59    | -1.27 | 45        | 0.1      | unk         | unk           |          |                     | PR                | CKD                  |    |
| 31                          | MGRS      | no        | T;B                                     | 69                 | 3.42    | 1.92  | 18        | 0.9      | IgG λ/IgG κ | neg           |          | 2.3                 | SD                | CKD                  |    |
| 33^                         | MGRS      | no        | C,B,D                                   | 5                  | 2.39    | 0.89  | 27        | 1.82     | Neg         | κ             |          | 47.6                | SD                | CKD, proteinuria     |    |
| 35^                         | MM        | no        | T,D;<br>B,D,M,Pr                        | 9                  | 2.2     | 0.1   | 29        | 3        | IgG κ       | unk           |          | 481                 | SD                | CKD, proteinuria     | 13 |
| 36                          | MM        | Yes       | L,D                                     | 58                 | 1.3     | 0     | 57        | 0.43     | Neg         | Neg           |          |                     | CR                | CKD, proteinuria     |    |
| 37                          | MGRS      | no        | None                                    | 1                  | unk     | unk   | unk       |          | Neg         | κ             |          |                     | SD                | unk                  | 1  |
| 38^                         | MGRS      | Yes       | T                                       | 49                 | 1.09    | -2.21 | 73        | 0.08     | Neg         | κ             |          | 4.5                 | PR                | NI                   |    |
| 39                          | MM        | no        | RTX                                     | 26                 | 1.4     | 0.3   | 37        | 0.3      | Neg         | Neg           |          |                     | CR                | CKD                  |    |
| <b>Non-crystalline LCPT</b> |           |           |                                         |                    |         |       |           |          |             |               |          |                     |                   |                      |    |
| 41                          | MM        | no        | T, Z                                    | 14                 | 1.6     | 1     | 28        | 0.03     | κ           | unk           |          |                     | SD                | CKD                  | 14 |
| 42                          | MM        | no        | "Chemo"                                 | 5                  | 1.1     | -0.18 | 54        | 1.35     | IgG κ       | κ             |          |                     | SD                | CKD, proteinuria     |    |
| 43                          | MM        | Yes       | "Chemo"                                 | 24                 | HD      | NA    | HD        |          | Neg         | Neg           |          |                     | PR                | ESRD                 | 24 |
| 44                          | SMM       | no        | B                                       | 17                 | 2.4     | 0.1   | 26        | 0.66     | IgG κ       | unk           |          | 20                  | SD                | CKD                  |    |
| 45^                         | MM        | no        | L,B,D                                   | 15                 | 0.8     | 0.1   | 75        |          | Neg         | Neg           |          | 1.02                | CR                | NI                   |    |
| 46                          | MM        | no        | no                                      | 10                 | 0.6     | 0     | 97        | 2+       | κ           | κ             |          |                     | SD                | NI, proteinuria      |    |

CR, complete remission; VGPR, very good partial remission; PR, partial remission; SD, stable disease  
 HD, hemodialysis; ESRD, end-stage renal disease; CKD, chronic kidney disease; NI, normal kidney function  
 B, bortezomib; C, cyclophosphamide; CDEP, cyclophosphamide + dexamethasone + etoposide + cisplatin; "Chemo", unspecified chemotherapy  
 CHOP: cyclophosphamide + doxorubicin + vincristine + prednisone; D, dexamethasone; DR, doxorubicin; Ev, everolimus; F, fludarabine; L, lenalidomide  
 M, melphalan; MGRS, monoclonal gammopathy of renal significance; MM, multiple myeloma; NA, not applicable  
 P, cisplatin; Pom, pomalidomide, Pr, prednisone; RTX, rituximab; SMM, smoldering multiple myeloma; T, thalidomide; unk, unknown; Z, zoledronate  
 ^, second opinion case

| Univariate and Multivariable Correlates of initial and final eGFR |                 |        |                  |                                   |        |                  |      |            |              |         |
|-------------------------------------------------------------------|-----------------|--------|------------------|-----------------------------------|--------|------------------|------|------------|--------------|---------|
| All LCPT cases                                                    |                 |        |                  |                                   |        |                  |      |            |              |         |
|                                                                   | Univariate      |        |                  | Multivariable                     |        |                  |      |            |              |         |
|                                                                   |                 | r      | p-value          | r=0.582, P=0.001                  | Beta   | p-value          |      |            |              |         |
| initial                                                           | age             | -0.323 | <b>0.029</b>     | age                               | -0.119 | 0.39             |      |            |              |         |
| eGFR                                                              | serum albumin   | 0.309  | 0.056            |                                   |        |                  |      |            |              |         |
| vs                                                                | IFTA            | -0.576 | <b>&lt;0.001</b> | IFTA                              | -0.546 | <b>&lt;0.001</b> |      |            |              |         |
|                                                                   | % Fibrosis      | -0.516 | <b>&lt;0.001</b> |                                   |        |                  |      |            |              |         |
|                                                                   | % Inflammation  | -0.459 | <b>0.001</b>     |                                   |        |                  |      |            |              |         |
|                                                                   |                 |        |                  | r = 0.815                         |        |                  |      |            |              |         |
| final                                                             | age             | -0.473 | <b>0.005</b>     | age                               | -0.247 | 0.079            |      |            |              |         |
| eGFR                                                              | IFTA            | -0.485 | <b>0.004</b>     | IFTA                              | 0.066  | 0.84             |      |            |              |         |
| vs                                                                | % Fibrosis      | -0.527 | <b>0.001</b>     | % Fibrosis                        | -0.215 | 0.52             |      |            |              |         |
|                                                                   | % Inflammation  | -0.476 | <b>0.004</b>     | % Inflammation                    | 0.029  | 0.86             |      |            |              |         |
|                                                                   | final Uvprotein | -0.451 | <b>0.016</b>     | final Uvprotein                   | -0.285 | 0.11             |      |            |              |         |
|                                                                   | initial eGFR    | 0.719  | <b>&lt;0.001</b> | initial eGFR                      | 0.513  | <b>0.006</b>     |      |            |              |         |
|                                                                   |                 |        |                  | or                                |        |                  |      |            |              |         |
|                                                                   |                 |        |                  | without initial eGFR in the model |        |                  |      |            |              |         |
|                                                                   |                 |        |                  | r=0.718, p=0.005                  |        |                  |      |            |              |         |
|                                                                   |                 |        |                  | age                               | -0.338 | <b>0.038</b>     |      |            |              |         |
|                                                                   |                 |        |                  | IFTA                              | -0.272 | 0.46             |      |            |              |         |
|                                                                   |                 |        |                  | % Fibrosis                        | -0.148 | 0.71             |      |            |              |         |
|                                                                   |                 |        |                  | % Inflammation                    | -0.02  | 0.92             |      |            |              |         |
|                                                                   |                 |        |                  | final Uvprotein                   | -0.266 | 0.14             |      |            |              |         |
|                                                                   |                 |        |                  |                                   |        |                  |      |            |              |         |
|                                                                   |                 |        |                  |                                   |        |                  |      |            |              |         |
| Crystalline LCPT cases                                            |                 |        |                  |                                   |        |                  |      |            |              |         |
|                                                                   | Univariate      |        |                  | Multivariable                     |        |                  |      |            |              |         |
|                                                                   |                 | r      | p-value          | r=0.746, P<0.001                  | Beta   | p-value          | or   | r=0.691, P | Beta         | p-value |
| initial                                                           | age             | -0.577 | <b>&lt;0.001</b> | age                               | -0.342 | <b>0.02</b>      | age  | -0.408     | <b>0.005</b> |         |
| eGFR                                                              | serum albumin   | 0.395  | <b>0.021</b>     | serum albumin                     | 0.386  | <b>0.038</b>     |      |            |              |         |
| vs                                                                | IFTA            | -0.565 | <b>&lt;0.001</b> | IFTA                              | -0.115 | 0.75             | IFTA | -0.455     | <b>0.002</b> |         |
|                                                                   | % Fibrosis      | -0.504 | <b>0.001</b>     | % Fibrosis                        | -0.511 | 0.21             |      |            |              |         |
|                                                                   | % Inflammation  | -0.516 | <b>0.001</b>     | % Inflammation                    | 0.234  | 0.27             |      |            |              |         |
|                                                                   |                 |        |                  | r = 0.842                         |        |                  |      |            |              |         |
| final                                                             | age             | -0.473 | <b>0.005</b>     | age                               | -0.382 | <b>0.018</b>     |      |            |              |         |
| eGFR                                                              | IFTA            | -0.485 | <b>0.004</b>     | IFTA                              | 0.036  | 0.92             |      |            |              |         |
| vs                                                                | % Fibrosis      | -0.527 | <b>0.001</b>     | % Fibrosis                        | -0.167 | 0.65             |      |            |              |         |
|                                                                   | % Inflammation  | -0.476 | <b>0.004</b>     | % Inflammation                    | 0.079  | 0.65             |      |            |              |         |
|                                                                   | final Uvprotein | -0.451 | <b>0.016</b>     | final Uvprotein                   | -0.406 | <b>0.042</b>     |      |            |              |         |
|                                                                   | initial eGFR    | 0.719  | <b>&lt;0.001</b> | initial eGFR                      | 0.33   | 0.072            |      |            |              |         |

**Supplemental Figure 5: Non-crystalline LCPT with possible physiologic light chain trafficking.**

5A

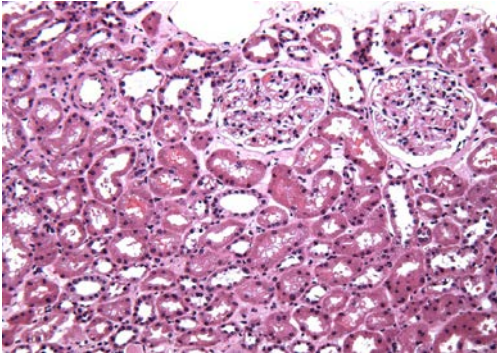

5B

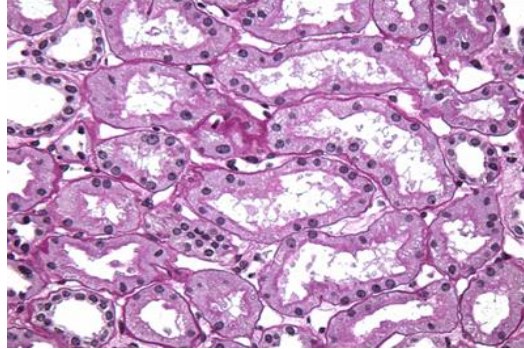

5C

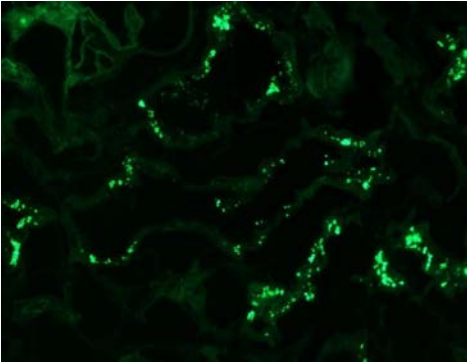

**Supplemental Figure 5 legend:**

5A. Low power view shows normal appearing proximal tubules with no evidence of acute tubular injury (H&E, x200).

5B. Higher power view reveals intact PAS-positive apical brush border. No intracytoplasmic crystalline inclusions or vacuoles are seen by light microscopy (PAS, x400X).

5C. Immunofluorescence performed on frozen tissue sections reveals droplets that stain intensely for kappa light chain within the cytoplasm of proximal tubular cells (FITC-conjugated antisera to kappa light chain, x400). The staining for lambda light chain was negative (not shown).

**Supplemental Figure 5: Non-crystalline LCPT with possible physiologic light chain trafficking.**

5D

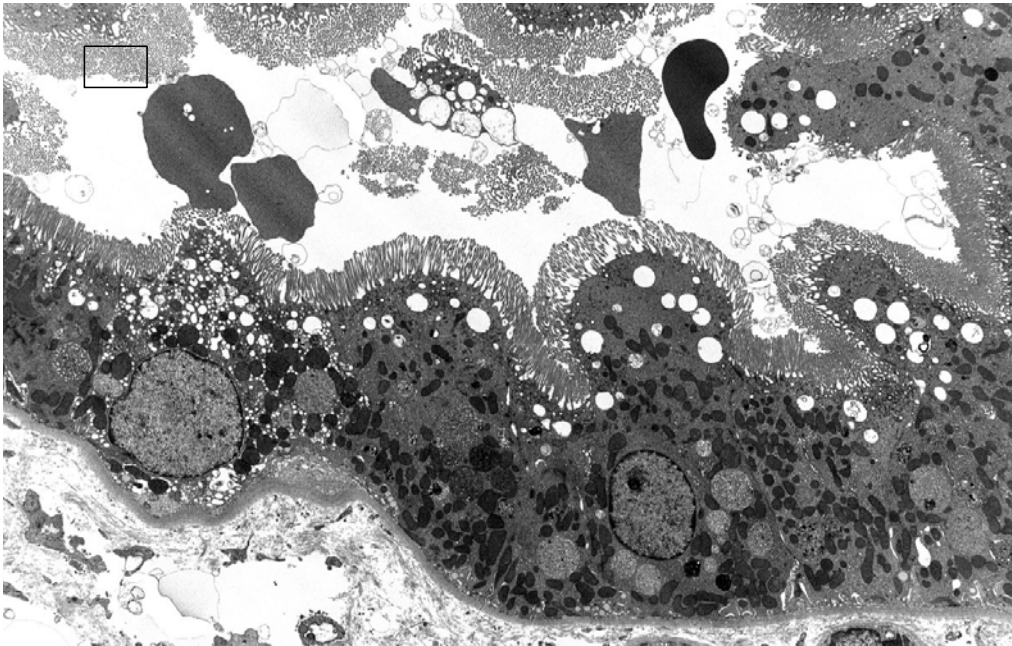

**Supplemental Figure 5 legend (continued):**

5D. Electron microscopy of a representative proximal tubule reveals increased number of endosomes (clear membrane bound vesicles) in the apical region. Microvillous brush border is intact. There are scattered rounded phagolysosomes containing non-specific amorphous material in the deeper cytoplasm; however, no crystalline inclusions are identified.
